# Supplementary material
Source: PubMed Central journal article supplement (PMC10528100)
Supplement: NIHMS1925721-supplement-1.pdf [file NIHMS1925721-supplement-1.pdf]

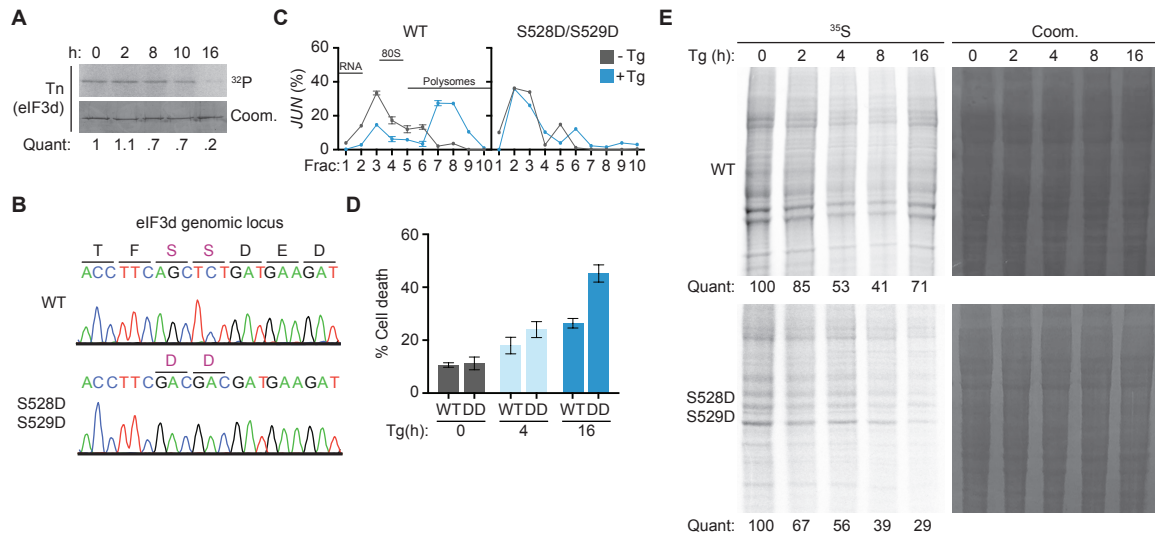

**Figure S1. Cell viability and protein synthesis is dysregulated in cells expressing phosphomimetic eIF3d during chronic ER stress, related to Figure 1.** (A) Phosphorylation of eIF3 subunits after treatment with tunicamycin (Tn). The phosphor image is representative of three independent experiments. (B) Sanger sequencing validation of genome editing to introduce coding changes S528D/S529D in the eIF3d genomic region of HEK293T cells. Shown is chr22 (-): 36,511,540–36,511,560. (C) Association of *Jun* mRNA with translation complexes in eIF3d cell lines. *Jun* abundance is expressed as a percentage of the transcripts summed from all fractions and plotted as the mean  $\pm$  s.d. from a representative quantitative reverse transcription polymerase chain reaction (qRT-PCR) performed in technical duplicate. Blue, Tg-treated cells; gray, untreated cells. WT, wild-type; DD, S528D/S529D. The results are representative of two biological replicates. (D) Percentage cell death of eIF3d cell lines upon treatment with Tg at annotated time points. Results are represented as the mean  $\pm$  s.d. of three independent experiments. (E) [<sup>35</sup>S]-methionine/cysteine labeling shows that HEK293T expressing phosphomimetic eIF3d are unable to restore partial global translational recovery at 16 h treatment with Tg. Phosphorimage of SDS–PAGE gel (<sup>35</sup>S) is shown resolving total cellular protein synthesis. Coomassie staining of the gel is shown as a loading control. Quantification (Quant.) of gel lane intensity is represented as fold change to cells at 0 h. The results are representative of two independent experiments.

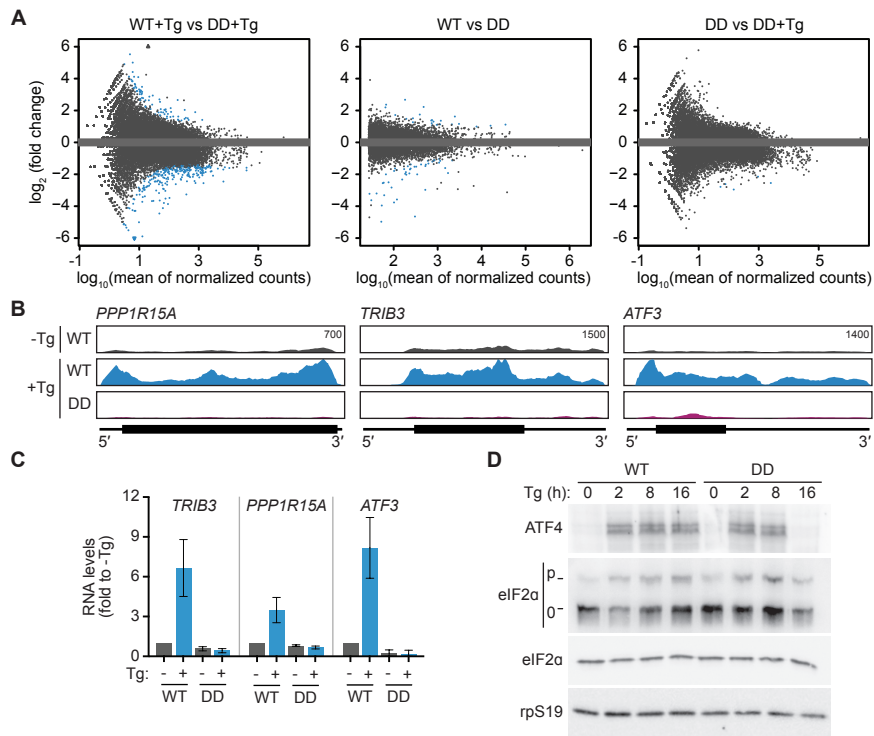

**Figure S2. Validation of dysregulated integrated stress response in cells expressing phosphomimetic eIF3d, related to Figure 1.** (A) MA plot comparing transcript expression level changes in cells expressing phosphomimetic (DD) or WT eIF3d with or without ISR induction. Genes with significant changes to expression ( $P_{adj} \leq 0.1$ ) are colored blue. (B) Read mapping of transcripts downregulated in HEK293T cells expressing phosphomimetic eIF3d (DD) versus wild-type (WT) cells upon integrated stress response (ISR) induction with thapsigargin (Tg). (C) Fold change in transcript expression levels in HEK293T expressing eIF3d mutants upon ISR induction. Results are normalized to untreated WT cells and represented as the mean  $\pm$  s.d. of three independent experiments. Tg treatments in (A–C) were performed for 16 h. (D) Immunoblot of ISR signaling cascade reveals temporal requirements for activated eIF3d. The results are representative of three independent experiments.

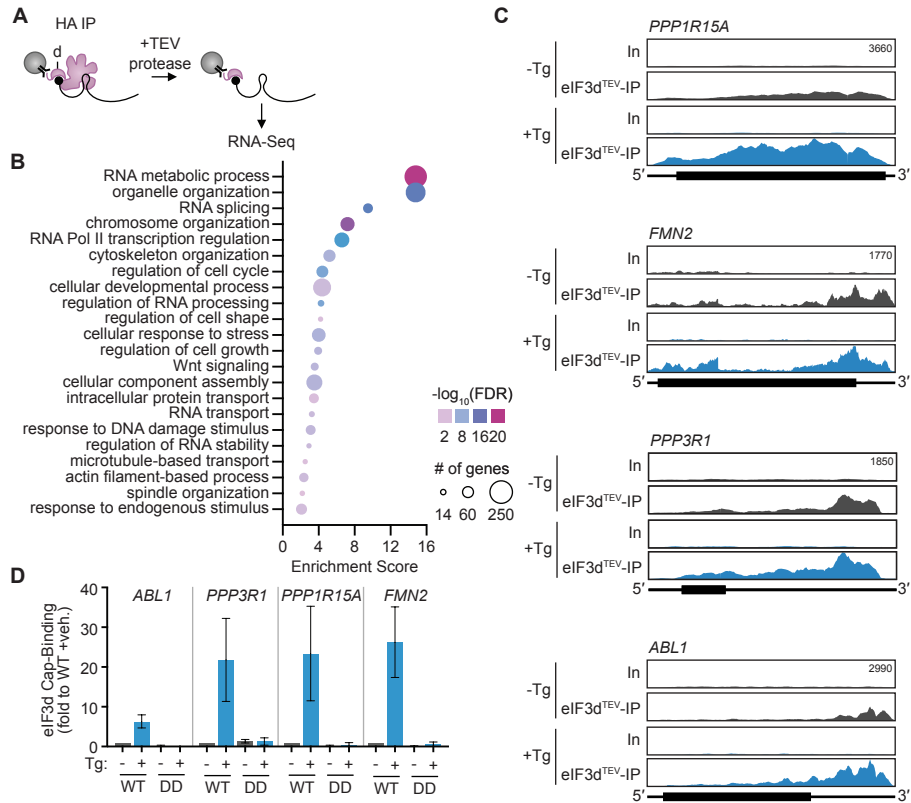

**Figure S3. eIF3d<sup>TEV</sup> Subunit-Seq identifies cap-binding targets involved in the ISR, related to Figure 2.** (A) Schematic of eIF3d<sup>TEV</sup> Subunit-Seq approach. (B) Gene ontology analysis of eIF3d targets from Tg-treated cells. (C) Read mapping to respective target transcripts identified by eIF3d<sup>TEV</sup> Subunit-Seq during ISR induction. (D) eIF3d binding to the 5' cap of target mRNAs. WT, wild-type; DD, S528D/S529D eIF3d. Cap-binding is normalized to untreated WT cells and represented as the mean  $\pm$  s.d. of three independent experiments.



**Figure S4. eIF3d-mediated translational control of *ALKBH5* requires 5' UTR RNA structure, related to Figure 3.** (A) Specificity of *in vitro* eIF3d crosslinking to the 5' cap structure of the *ALKBH5* 5' UTR. m<sup>7</sup>G, m<sup>7</sup>GpppG; G, GpppG. The results are representative of three independent experiments. (B) Association of *ALKBH5* mRNA with translation complexes in eIF3d cell lines. *ALKBH5* abundance is expressed as a percentage of the transcripts summed from all fractions and plotted as the mean  $\pm$  s.d. Blue, Tg-treated cells; gray, untreated cells. WT, wild-type; DD, S528D/S529D. The results are representative of two biological replicates. (C) Representative native gel shift showing binding of recombinant eIF3 and *ALKBH5* 5' UTR RNA. Result is representative of three independent experiments. (D) *In vitro* luciferase activity from *PSMB6* 5' UTR luciferase reporter mRNA. *PSMB6* is not targeted by eIF3 and undergoes translation shutoff during the ISR. Results are normalized to extracts from untreated cells and represent the mean  $\pm$  s.d. of three independent experiments.



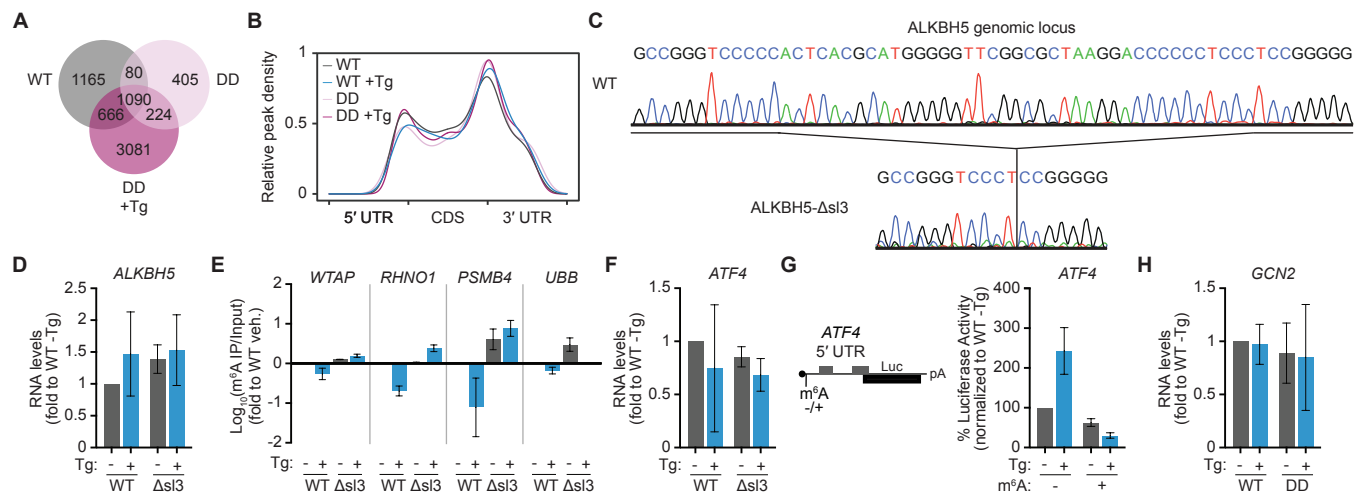

**Figure S5. ISR-regulated mRNA demethylation is dependent on translation regulation of *ALKBH5*, related to Figure 4. (A)** Venn diagram of overlapping m<sup>6</sup>A-modified transcripts in vehicle or Tg-treated wild-type (WT) and phosphomimetic (DD) eIF3d expressing HEK293T. **(B)** Distribution in transcript regions of all m<sup>6</sup>A sites in eIF3d mutant cell lines. UTR, untranslated region; CDS, coding sequence. **(C)** Sanger sequencing validation of genome editing to remove the eIF3 binding site from the *ALKBH5* genomic region of HEK293T cells. Shown is chr17 (+): 18,184,106–18,184,164. **(D)** Transcript expression levels of *ALKBH5* are unaffected in cells expressing *ALKBH5* with a mutated 5' UTR.  $\Delta$ sl3, cells with deletion of the eIF3 binding site in *ALKBH5* ( $\Delta$ sl3). **(E)** Levels of m<sup>6</sup>A in transcripts in cells with dysregulated eIF3d-specialized translational control of *ALKBH5*. m<sup>6</sup>A is measured by m<sup>6</sup>A-RIP and qRT-PCR. **(F)** Transcript expression levels of *ATF4* in *ALKBH5*- $\Delta$ sl3 cells. **(G)** Luciferase activity *in vitro* mediated by the *ATF4* 5' UTR is inhibited in the presence of cap-proximal m<sup>6</sup>A modification during chronic ER stress. Results are normalized to unmodified RNA in untreated cells. **(H)** Transcript expression levels of *GCN2* are not significantly changed in HEK293T expressing eIF3d mutants. Results in (D–H) are normalized to untreated WT cells and represented as the mean  $\pm$  s.d. of three independent experiments. Tg treatments were performed for 16 h.

**Table S4. Table of oligonucleotides, related to STAR Methods**

| Oligonucleotide name   | Sequence (5'-3')                                                                                        |
|------------------------|---------------------------------------------------------------------------------------------------------|
| CRISPR/Cas9 Editing    |                                                                                                         |
| sgRNA ALKBH5           | GGCTCTAAGGGGACGCGCCC                                                                                    |
| sgRNA eIF3d            | CTCATCTTCATCAGAGCTGA                                                                                    |
| Donor ALKBH5           | CCACTCACGCATGGGGGTTTCGGCGCTAAGGACCCCCCTC<br>CGACCCTAGAGCAGCGTCGTGGGGGCCATGGCGCCGCCA<br>G                |
| Donor eIF3d            | CTTCCTCTTCTTCTCCTCCTCCTCCTCCTCATCTTCATCGT<br>CGTCGAAGGTGCCATCAGGGAGGCTGTAGACACGGATGA<br>CCTGCTTGTTGGGGT |
| Cloning                |                                                                                                         |
| ALKBH5 cloning, SacI-F | GCAGAGCTCTCTGGCTAACTAGAGAACCCACTGCTTACTG<br>GC                                                          |
| ALKBH5 cloning, NheI-R | CCCTCTAGACTCGAGGCTAGCACCGCGGC                                                                           |
| ALKBH5 cloning, D-R    | GGGGGGCGTCGAGGGTCCGGGC                                                                                  |
| ALKBH5 cloning, D-F    | GACCCTCGACGCCCCCGCTAAGGACCCCCCTCCCTCCG<br>GG                                                            |
| ALKBH5 cloning, stem-R | GGGGGGCGTCGAGGGTCCGGGC                                                                                  |
| ALKBH5 cloning, stem-F | CCCTCGACGCCCCCGGCCCTCCCCACTCACGCATGG<br>GGG                                                             |
| ALKBH5 cloning, comp-R | AGGGAGGGGGGTCCTTAGCCGGCTTCCCCCATGCGTG                                                                   |
| ALKBH5 cloning, comp-F | CTAAGGACCCCCCTCCCTCCGGGGG                                                                               |
| ALKBH5 cloning, loop-R | GCGCCGAACCCCCAACGCACTCTGGGGGACCCGGC                                                                     |
| ALKBH5 cloning, loop-F | TGGGGGTTTCGGCGCTAAGGACCC                                                                                |
| GCN2 cloning, seq-F    | CGAAATTAATACGACTCACTATAAGCGCGGAGCCCCGCCC<br>CGC                                                         |
| GCN2 cloning, seq-R    | CATAAACTTTTCGAAGTCATGGCAGCGCTGCGCCCAAGGC                                                                |
| ATF4 cloning, seq-F    | CGAAATTAATACGACTCACTATACATTTCTACTTTGCCCGC<br>CCAC                                                       |
| ATF4 cloning, seq-R    | CATAAACTTTTCGAAGTCATGTTGCGGTGCTTTGCTGGAATC<br>G                                                         |
| RT-qPCR                |                                                                                                         |
| PSMB6-qPCR-F           | CGGGAAGACCTGATGGCGGGA                                                                                   |
| PSMB6-qPCR-R           | TCCCGGAGCCTCCAATGGCAAA                                                                                  |
| Jun-qPCR-F             | TGACTGCAAAGATGGAAACG                                                                                    |
| Jun-qPCR-R             | CAGGGTCATGCTCTGTTTCA                                                                                    |
| ATF4-qPCR-F            | CTTGATGTCCCCCTTCGACC                                                                                    |
| ATF4-qPCR-R            | CTTGTCGCTGGAGAACCCAT                                                                                    |
| ALKBH5-qPCR-F          | CGGCGAAGGCTACACTTACG                                                                                    |
| ALKBH5-qPCR-R          | CCACCAGCTTTTGGATCACCA                                                                                   |
| FTO-qPCR-F             | ACTTGGCTCCCTTATCTGACC                                                                                   |
| FTO-qPCR-R             | TGTGCAGTGTGAGAAAGGCTT                                                                                   |
| GCN2-qPCR-F            | AGGTCTAGGCGAGAACGTCA                                                                                    |
| GCN2-qPCR-R            | CCACTGAAGGACCCACTCAT                                                                                    |
| TRIB3-qPCR-F           | CCGCCCTGGCGCACTGTCAC                                                                                    |
| TRIB3-qPCR-R           | GTCCCACGTAGGCTGGGCAC                                                                                    |
| ATF3-qPCR-F            | GCCACCGGATGTCCTCTGCG                                                                                    |

|                    |                                                          |
|--------------------|----------------------------------------------------------|
| ATF3-qPCR-R        | GTTTCGGCACTTTGCAGCTGC                                    |
| PPP1R15A-qPCR-F    | CCGACTGCAAAGGCGGCTCA                                     |
| PPP1R15A -qPCR-R   | CAGCCAGGAAATGGACAGTGAC                                   |
| ABL1-qPCR-F        | GGACTACCGCATGGAGC                                        |
| ABL1-qPCR-R        | CTCACAGCCCCACGGACG                                       |
| PPP3R1-qPCR-F      | CGACACAGATGGGAATGGAGAAGTAGAC                             |
| PPP3R1-qPCR-R      | GTATCTTTCAGATTGTTCCCCACCATCATCTTCAATAC                   |
| FMN2-qPCR-F        | GGGCAGTTTCTAGGCGAGTTCC                                   |
| FMN2-qPCR-R        | CTTCTGGACAGCATCTGAGCGT                                   |
| WTAP-qPCR-F        | GCAACAACAGCAGGAGTCTGC                                    |
| WTAP-qPCR-R        | CTGCTGGACTTGCTTGAGGTAC                                   |
| RHNO1-qPCR-F       | GACCACAGCACCATCACTTCC                                    |
| RHNO1-qPCR-R       | GGTTTTCGACTTGAGTGTCTCG                                   |
| UBB-qPCR-F         | GCCGCACTCTTTCTGACTACAAC                                  |
| UBB-qPCR-R         | CCTCCAGAGTGATGGTCTTGC                                    |
| PSMB4-qPCR-F       | CGCGACTTAGTAGAACGCTGCA                                   |
| PSMB4-qPCR-R       | GTCTCTGTAGACAATGGTCCC                                    |
| RNA SHAPE analysis |                                                          |
| ALKBH5-SHAPE       | GAACCGGACCGAAGCCCGGGCCTTCGTCTTCGGCCCC<br>ACGACGCTGCTCTAG |
